# Supplementary material for: High-resolution crystal structure of a polyextreme GH43 glycosidase from Halothermothrix orenii with α-l-arabinofuranosidase activity
Source: PubMed Central journal article supplement (PMC4356313; doi:10.1107/s2053230x15003337), 2015-02-19
Supplement: f-71-00338-sup1.pdf [file f-71-00338-sup1.pdf]

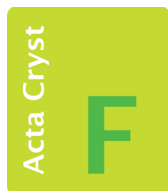

STRUCTURAL BIOLOGY  
COMMUNICATIONS

**Volume 71 (2015)**

**Supporting information for article:**

**High-resolution crystal structure of a polyextreme GH43  
glycosidase from *Halothermothrix orenii* with  $\alpha$ -l-  
arabinofuranosidase activity**

**Noor Hassan, Lokesh D. Kori, Rosaria Gandini, Bharat K. C. Patel, Christina  
Divne and Tien Chye Tan**

## Supplimentary information

### High-resolution crystal structure of a polyextreme GH43 glycosidase from *Halothermothrix orenii* with $\alpha$ -L-arabinofuranosidase activity

Noor Hassan,<sup>a,b</sup> Lokesh D. Kori,<sup>c,d</sup> Rosaria Gandini,<sup>a,b</sup> Bharat K. C. Patel,<sup>c</sup> Christina Divne,<sup>a,b</sup> and Tien Chye Tan<sup>a,b\*</sup>

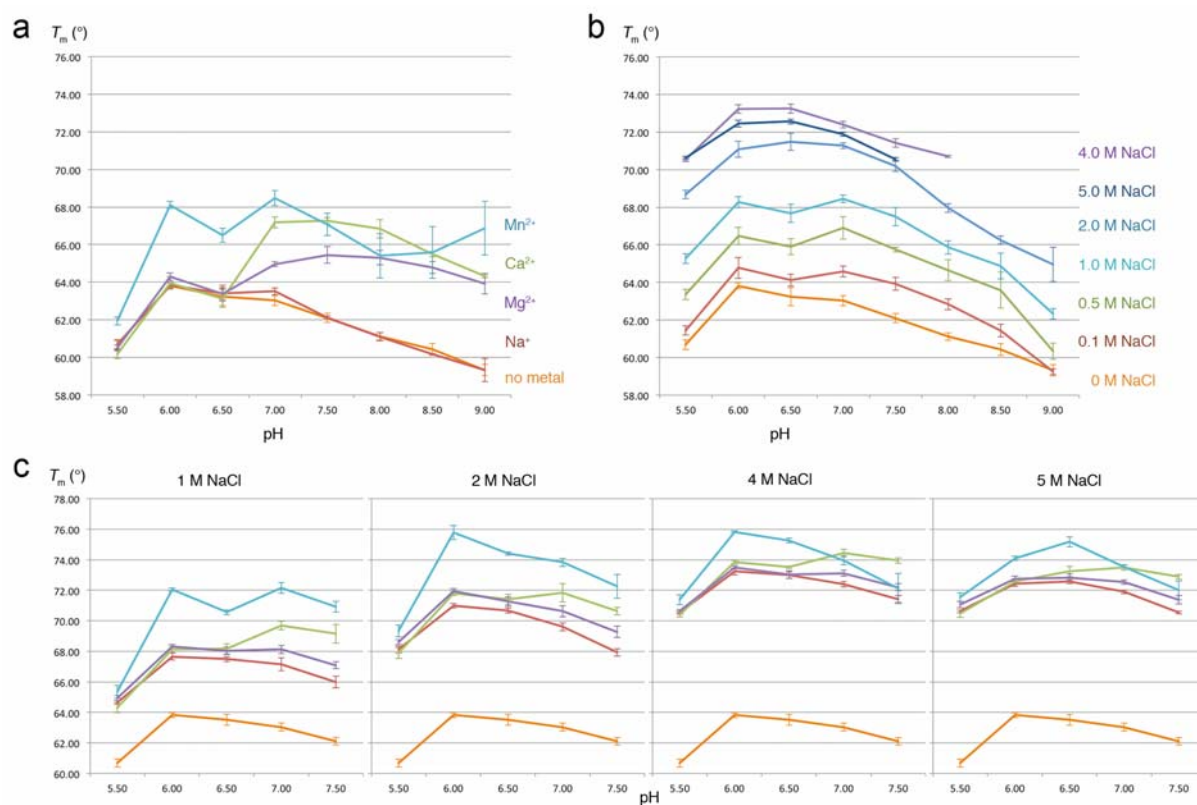

**Supplementary Figure S1.** Melting temperature of unfolding ( $T_m$ ) as a function of (a) 2 mM metal ion (Mn<sup>2+</sup>, Ca<sup>2+</sup>, Mg<sup>2+</sup> and Na<sup>+</sup>), (b) NaCl concentration, and (c) the combined effect of NaCl concentration and metal ion (orange, no metal; red, Na<sup>+</sup>; purple, Mg<sup>2+</sup>; green, Ca<sup>2+</sup>; blue, Mn<sup>2+</sup>).

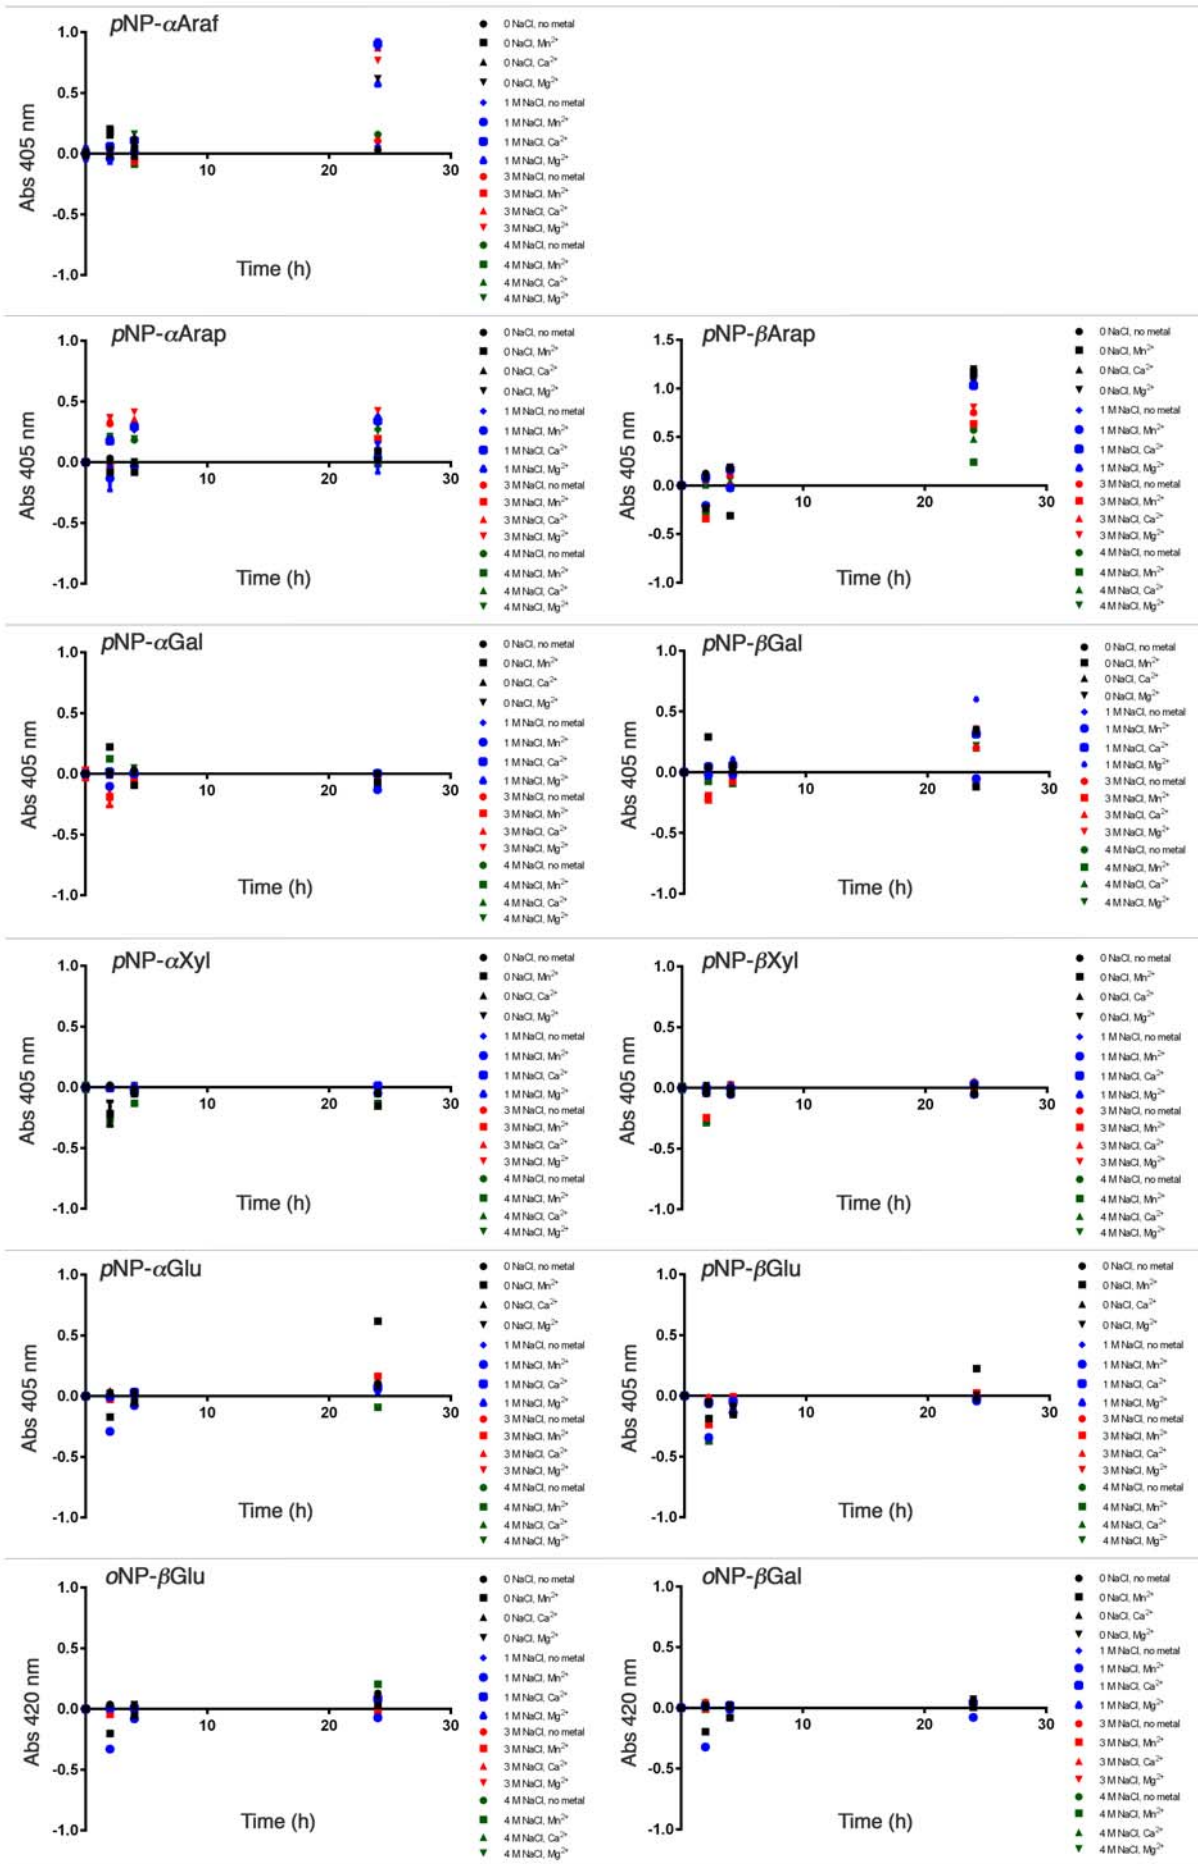

**Supplementary Figure S2.** Activity screen using chromophoric substrates. The initial screen was performed using eleven *p*- and *o*-nitrophenyl sugars, various NaCl concentrations (0, 1, 2 and 4 M NaCl), and different divalent cations (2 mM Mn<sup>2+</sup>, Mg<sup>2+</sup> or Ca<sup>2+</sup>). The release of chromophore was measured as the absorbance at 405 nm for *p*-nitrophenyl and at 420 nm for *o*-nitrophenyl.

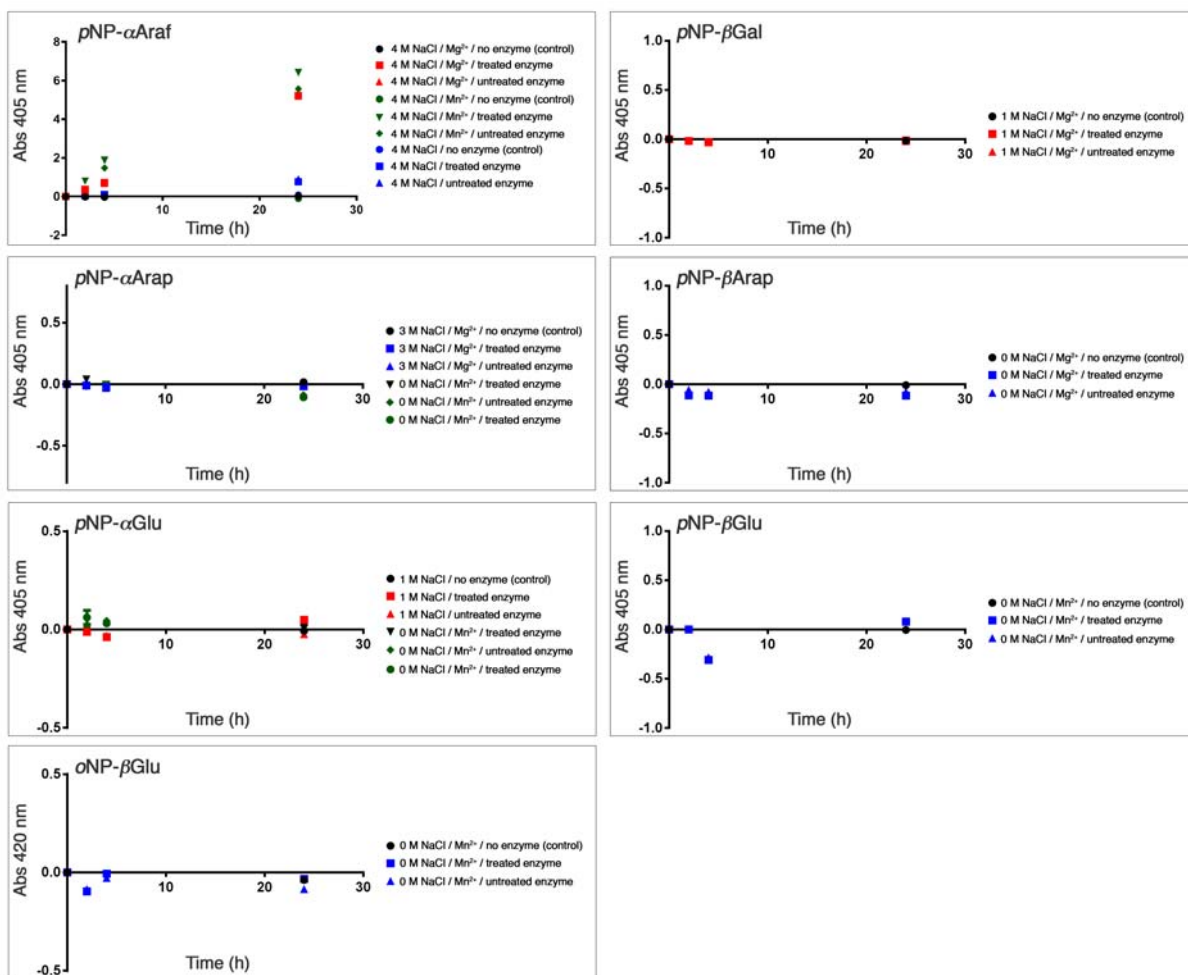

**Supplementary Figure S3.** Activity assay using a subset of substrates and conditions. Assays were performed with both EDTA/EGTA-treated and untreated protein.



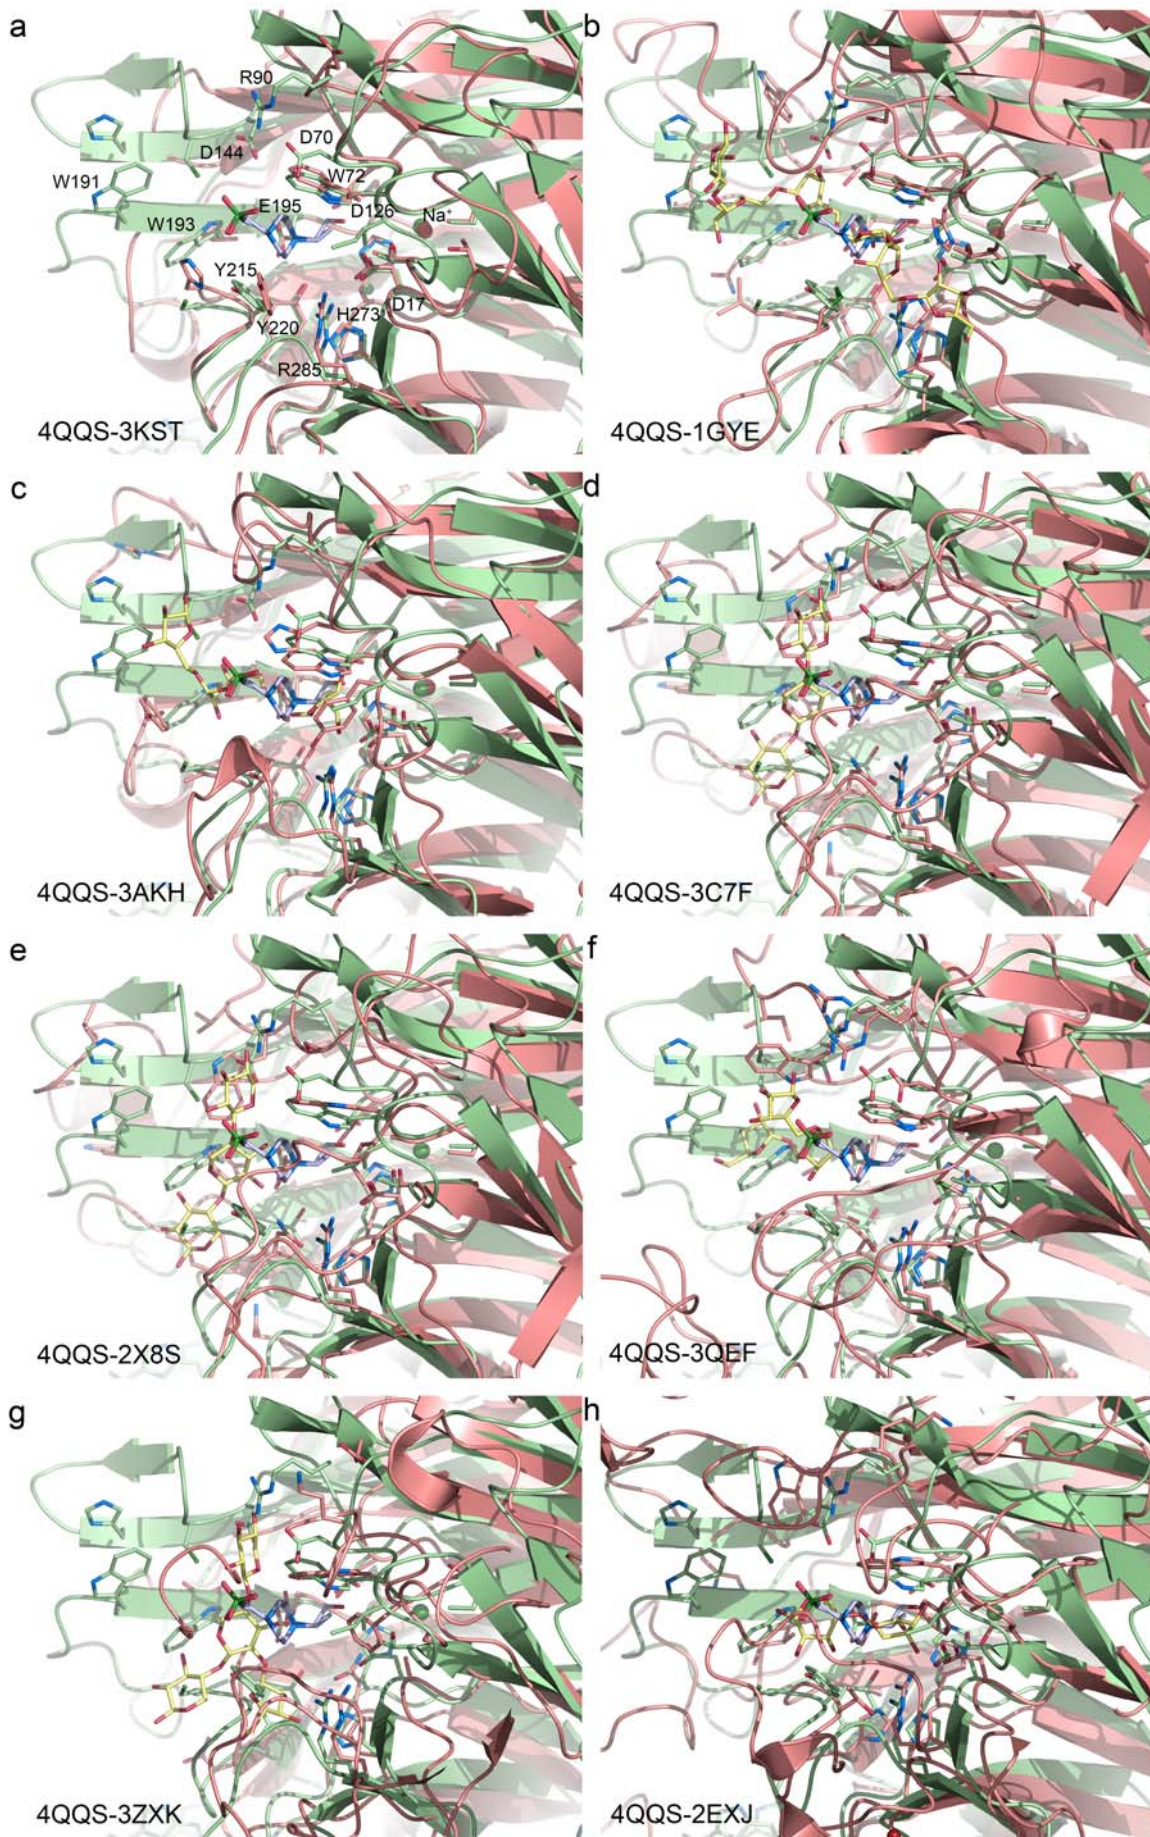

**Supplementary Figure S4.** Comparison of *HoAraf43* (green ribbon) with representative GH43 enzyme-carbohydrate complexes (red ribbon): (a) *B. thetaiotaomicron* endo-1,4- $\beta$ -xylanase (3KST; r.m.s.d. 1.22 Å for 257 C $\alpha$  atoms); (b) exo- $\alpha$ -1,5-L-arabinanase *CjArb43A* in complex with arabinohexaose (1GYE; Nurizzo *et al.*, 2002; r.m.s.d. 1.63 Å for 230 C $\alpha$  atoms); (c) exo- $\alpha$ -1,5-L-arabinofuranosidase *SaAraf43A* in complex with  $\alpha$ -L-arabinofuranotriose (3AKH; Fujimoto *et al.*, 2010; r.m.s.d. 1.62 Å for 251 C $\alpha$  atoms); (d) *B. subtilis* arabinoxylan  $\alpha$ -1,3-L-arabinofuranohydrolase in complex with xylotriose (3C7F; Vandermarliere *et al.*, 2009; r.m.s.d. 1.88 Å for 229 C $\alpha$  atoms); (e) *B. subtilis* endo- $\alpha$ -1,5-L-arabinanase *Abn2* in complex with arabinotriose (2X8S; de Sanctis *et al.*, 2010; r.m.s.d. 1.71 Å for 219 C $\alpha$  atoms); (f) *C. japonicus*  $\alpha$ -1,2-L-arabinofuranosidase *Abf43A* in complex with  $\alpha$ -1,3-arabinofuranose-substituted arabinofuranoside-substituted  $\alpha$ -1,5-L-arabinotriose (3QEF; Cartmell *et al.*, 2011; r.m.s.d. 1.70 Å for 231 C $\alpha$  atoms); (g) *H. insolens* *HiAXHd3* in complex with xylotriose (3ZXK; McKee *et al.*, 2012; r.m.s.d. 2.18 Å for 242 C $\alpha$  atoms); (h) *G. stearothermophilus*  $\beta$ -xylosidase *XynB3* in complex with xylobiose (2EXJ; Br $\ddot{u}$ x *et al.*, 2006; r.m.s.d. 1.74 Å for 268 C $\alpha$  atoms). Selected amino acids in *HoAraf43* have been added to panel (a).
